# Supplementary material
Source: PubMed Central journal article supplement (PMC6143001)
Supplement: jamaotolaryngolheadnecksurg-144-712-s001.pdf [file jamaotolaryngolheadnecksurg-144-712-s001.pdf]

## Supplementary Online Content

Hwang J-H, Tsai S-J, Liu T-C, Chen Y-C, Lai J-T. Association of tinnitus and other cochlear disorders with a history of migraines. *JAMA Otolaryngol Head Neck Surg*. Published online July 12, 2018. doi:10.1001/jamaoto.2018.0939

**eTable 1.** The Inclusion and Exclusion Diseases and Their *ICD-9* Codes in this Study

**eTable 2.** Adjusted Hazard Ratios (aHRs) for Individual Cochlear Disorders (Tinnitus, Sensorineural Hearing Impairment, and Sudden Deafness) Associated With Migraine

**eTable 3.** Adjusted Hazard Ratios (aHRs) for Combined Cochlear Disorders Associated With Migraine if Migraine Cases Were Defined as the Presence of  $\geq 2$  *ICD-9* codes 346.01, 346.10, 346.90 During the Period 1996-2012

**eTable 4.** Adjusted Hazard Ratios (aHRs) for Individual Cochlear Disorders Associated With Migraine if Migraine Cases Were Defined as the Presence of  $\geq 2$  *ICD-9* codes 346.01, 346.10, 346.90 During the Period 1996-2012

This supplementary material has been provided by the authors to give readers additional information about their work.

**eTable 1.** The Inclusion and Exclusion Diseases and Their *ICD-9* Codes in this Study

|                  | <u>Disease</u>                                                                           | <u>ICD-9 codes</u>                                                                                                                                                                                                              |
|------------------|------------------------------------------------------------------------------------------|---------------------------------------------------------------------------------------------------------------------------------------------------------------------------------------------------------------------------------|
| <u>Inclusion</u> | <u>Migraine</u>                                                                          | <u>346.01, 346.10, 346.90</u>                                                                                                                                                                                                   |
| <u>Exclusion</u> | <u>Schizophrenia</u>                                                                     | <u>295.90</u>                                                                                                                                                                                                                   |
|                  | <u>Benign brain tumor</u>                                                                | <u>225, 227.3</u>                                                                                                                                                                                                               |
|                  | <u>Malignant brain tumor</u>                                                             | <u>191,192</u>                                                                                                                                                                                                                  |
|                  | <u>Ischemic cerebrovascular diseases</u><br><u>and</u><br><u>basilar artery syndrome</u> | <u>433.01, 433.10, 433.11, 433.21,</u><br><u>433.90, 434, 435.0, 435.1, 435.3,</u><br><u>435.8, 435.9, 436, 437.0, 437.8,</u><br><u>437.9, 438.89, 438.9</u><br><u>432.9, 432.1, 431, 430, 852.00,</u><br><u>852.40, 852.46</u> |
|                  | <u>Hemorrhagic stroke</u>                                                                | <u>800–804, 850–854, 873, 310.2,</u><br><u>907</u>                                                                                                                                                                              |
|                  | <u>Brain concussion or head trauma</u>                                                   | <u>345.9, 345.71, 780.39, 345.40,</u><br><u>345.41, 345.11, 345.10</u>                                                                                                                                                          |
|                  | <u>Epilepsy/convulsions</u>                                                              | <u>747.81, 437.3, 442.81, 442.89</u>                                                                                                                                                                                            |
|                  | <u>Aneurysm or arteriovascular</u><br><u>malformation of brain and neck</u>              | <u>348.1</u>                                                                                                                                                                                                                    |
|                  | <u>Anoxic brain damage</u>                                                               | <u>324, 323.9</u>                                                                                                                                                                                                               |
|                  | <u>Brain abscess/encephalitis</u>                                                        | <u>225.1</u>                                                                                                                                                                                                                    |
|                  | <u>Vestibular schwannoma</u>                                                             | <u>389.0</u>                                                                                                                                                                                                                    |
|                  | <u>Conductive hearing loss</u>                                                           | <u>387.9</u>                                                                                                                                                                                                                    |
|                  | <u>Otosclerosis</u>                                                                      | <u>388.3, 388.30, 388.31, 388.32</u>                                                                                                                                                                                            |
|                  | <u>Tinnitus</u>                                                                          | <u>388.12, 388.40, 389.1, 389.2,</u><br><u>389.7,</u>                                                                                                                                                                           |
|                  | <u>sensorineural hearing impairment</u>                                                  | <u>389.8, 389.9, 389</u><br><u>388.2</u>                                                                                                                                                                                        |
|                  | <u>sudden deafness</u>                                                                   |                                                                                                                                                                                                                                 |

**eTable 2.** Adjusted Hazard Ratios (aHRs) for Individual Cochlear Disorders (Tinnitus, Sensorineural Hearing Impairment, and Sudden Deafness) Associated With Migraine

| aHR<br>(95% CI, <i>P</i> Value) | Tinnitus                            | Sensorineural<br>hearing impairment | Sudden deafness                    |
|---------------------------------|-------------------------------------|-------------------------------------|------------------------------------|
| Migraine (yes/no)               | 3.30<br>(2.17-5.00, <i>P</i> <.001) | 1.03<br>(0.17-6.41, <i>P</i> =.97)  | 1.22<br>(0.53-2.83, <i>P</i> =.65) |

Abbreviation: CI, confidence interval. Adjusted for all covariates.

**eTable 3.** Adjusted Hazard Ratios (aHRs) for Combined Cochlear Disorders Associated With Migraine if Migraine Cases Were Defined as the Presence of  $\geq 2$  ICD-9 codes 346.01, 346.10, 346.90 During the Period 1996-2012

| Variable               | aHR  | 95% CI     | P Value |
|------------------------|------|------------|---------|
| Migraine (yes/no)      | 2.68 | 2.13-3.37  | <.001   |
| Sex (men/women)        | 0.78 | 0.61-1.00  | .05     |
| Age (per year)         | 1.03 | 1.03-1.04  | <.001   |
| Comorbidity (yes/no)   |      |            |         |
| Sleep disorders        |      | Drop out** |         |
| Heart diseases         | 0.67 | 0.09-4.86  | .70     |
| Hypertension           |      | Drop out** |         |
| Diabetes               |      | Drop out** |         |
| Hyperlipidemia         |      | Drop out** |         |
| Chronic kidney disease |      | Drop out** |         |
| Chronic hepatitis      |      | Drop out** |         |
| Anxiety                |      | Drop out** |         |
| Depression             |      | Drop out** |         |
| COPD                   |      | Drop out** |         |
| Pregnancy              |      | Drop out** |         |
| Menopause              |      | Drop out** |         |
| Oral contraceptives    | 1.56 | 0.95-2.58  | .08     |
| Geographic region      |      |            |         |
| Northern               | 1    | Reference  |         |
| Central                | 1.07 | 0.84-1.36  | .59     |
| Eastern                | 0.46 | 0.19-1.12  | .09     |
| Southern               | 1.19 | 0.96-1.46  | .11     |
| Urbanization level     |      |            |         |
| Urban                  | 1    | Reference  |         |
| Suburban               | 1.04 | 0.85-1.27  | .73     |
| Rural                  | 1.02 | 0.78-1.34  | .88     |
| Enrollee category      |      |            |         |
| 1                      | 1    | Reference  |         |
| 2                      | 0.51 | 0.33-0.78  | .02     |
| 3                      | 1.14 | 0.93-1.40  | .21     |
| 4                      | 1.00 | 0.79-1.27  | .97     |

Abbreviation: CI, confidence interval; COPD, chronic obstructive pulmonary disease. Adjusted for all covariates.

\*\* It was correlated with another independent factor (collinearity) during regression analysis.

**eTable 4.** Adjusted Hazard Ratios (aHRs) for Individual Cochlear Disorders Associated With Migraine if Migraine Cases Were Defined as the Presence of  $\geq 2$  ICD-9 codes 346.01, 346.10, 346.90 During the Period 1996-2012

| aHR<br>(95% CI, <i>P</i> Value) | Tinnitus                            | Sensorineural<br>hearing impairment | Sudden deafness                     |
|---------------------------------|-------------------------------------|-------------------------------------|-------------------------------------|
| Migraine (yes/no)               | 3.00<br>(2.32-3.87, <i>P</i> <.001) | 1.60<br>(0.92-2.78, <i>P</i> =.09)  | 3.51<br>(1.46-8.44, <i>P</i> =.005) |

Abbreviation: CI, confidence interval. Adjusted for all covariates.
